# Supplementary material
Source: publisher figshare collection journal article supplement (https://gsapubs.figshare.com/ndownloader/files/23316548)
Supplement: Supplementary file 1 [file 23316548]

## Sheet: DRM stratigraphy
	District		Thana	Mumbai	Raigad	Ratnagiri	Sindhudurga		Nasik	Pune	Satara	Kolhapur		Nandurbar (south of Tapi river)	Ahmednagar	Sangli		Dhule (South of Tapi river)	Aurangabad	Solapur		Jalgaon (south of Tapi river)	Jalna	Beed	Osmanabad		Buldhana (south of Tapi)	Parbhani	Latur		Nandurbar (North of Tapi river)	Dhule (North of Tapi river)	Jalgaon (North of Tapi river)	Kharagon (South of Narmada)	Khandwa (South of Narmada)	Buldhana (North of Tapi)	Akola	Nanded	Yavatmal		Amravati (South of Purna)	Amravati (North of Purna)	Wardha	Nagpur	Chandrapur		Jhabua	Ratlam	Dhar
	Log No. in Fig.8 of main paper		1	2	3	4	5		6	7	8	9		10b	11	12		13b	14	15		16b	17	18	19		20b	21	22		10a	13a	16a	36b	38	20a	23	24	26		25		27	28	29		30	31	32
	Subprovince of DVP		Western																												Central																Malwa
	Zones (North to South)		Konkan Coastal Belt						Deccan Plateau (WGE & Uplands)					Deccan Plateau																	Satpura							Deccan Plateau			Eastern Deccan Plateau (Tapi - Purna Valleys)						Malwa
	Group		Sahyadri	Sahyadri	Sahyadri	Sahyadri	Sahyadri		Sahyadri	Sahyadri	Sahyadri	Sahyadri		Sahyadri	Sahyadri	Sahyadri		Sahyadri	Sahyadri +Satpura	Sahyadri		Sahyadri	Sahyadri/Satpura	Sahyadri	Sahyadri		Sahyadri	Sahyadri/Satpura	Sahyadri/Satpura		Sahyadri +Satpura	Satpura	Satpura	Satpura	Satpura	Satpura	Sahyadri	Satpura	Sahyadri/Satpura		Sahyadri	Satpura	Sahyadri/Satpura	Sahyadri/Satpura	Sahyadri/Satpura		Malwa	Malwa	Malwa
	Max elevation in m above msl		586	485	532	200	230		1646	1300	1345	925		1183	962	872		770	891	520		889	713	892	665		706	440	702		1183	792	889	956	640	706	552	754	460		406	918	307	522			470	540	672
	Min elevation in m above msl		0	0	0	0	0		560	465	565	530		80	462	538		245	440	419		142	398	455	560		480	380	576		80	245	142	125	320	480	263	340	232		290	290	202	350			346	334	283
	Thickness in m used for plotting		586	485	532	200	230		1086	835	780	395		1103	500	334		525	451	101		747	315	437	105		226	60	126		1103	547	747	831	320	226	289	414	228		116	628	105	172	100		124	206	389
			Borivali	Borivali																													V			Golai											Singarchori
				Elephanta	Elephanta																												IV			Bargonda					Ritpur	V					Bargonda		Bargonda
						Mahabal-eshwar	Mahabal-eshwar			Mahabal-eshwar	Mahabal-eshwar	Mahabal-eshwar			Mahabal-eshwar	Mahabal-eshwar				Mahabal-eshwar				Mahabal-eshwar	Mahabaleshwar			Karanja / Mahabaleshwar	Karanja		Satpura Group	Satpura Group	III				Karanja	Karanja	Karanja		Karanja	IV	Karanja	Karanja	Karanja
					Purandargad	Purandargad	Purandargad			Purandargad	Purandargad	Purandargad			Purandargad	Purandargad				Purandargad			Buldhana	Purandar	Purandargad		Buldana	Buldana / Purandargad	Buldana				II			Indore	Buldana	Buldana	Buldana			III					Indore	Indore	Indore
					Diveghat	Diveghat				Diveghat	Diveghat				Diveghat	Diveghat			Diveghat / Chikhli	Diveghat			Chikhli	Diveghat	Diveghat		Chikhli	Chikhli / Diveghat					I				Chikhali	Chikhali	Chikhali		Chikhali	II	Chikhali	Chikhali	Chikhali
																																															Kankariya-Pirukheri	Kankariya-Pirukheri	Kankariya-Pirukheri
			Karla		Karla	Karla				Karla					Karla					Karla													Chahardihi	_								I
			Indrayani		Indrayani					Indrayani					Indrayani				Indrayani / Ajanta	Indrayani		Ajanta	Ajanta	Indrayani	Indrayani		Ajanta	Ajanta / Indrayani						_	_		Ajanta	Ajanta	Ajanta				Ajanta		Ajanta
			Upper Ratangarh	Upper Ratangarh	Upper Ratangarh				Upper Ratangarh	Upper Ratangarh				Upper Ratangarh	Upper Ratangarh			Upper Ratangarh	Upper Ratangarh			Upper Ratangarh	Upper Ratangarh	Upper Ratangad				Upper Ratangad			Upper Ratangarh			_	_	Kalisindh							-	-	-		Kalisindh	Kalisindh	Kalisindh
			Lower Ratangarh		Lower Ratangarh				Lower Ratangarh	Lower Ratangarh				Lower Ratangarh	Lower Ratangarh			Lower Ratangarh	Lower Ratangarh			Lower Ratangarh									Lower Ratangarh			_	_
																																		_	_												Mandleshwar	Madleshwar	Madleshwar
			Salher		Salher				Salher					Salher				Salher													Salher			_	_
	Phanerozoic Basement		Not exposed	Not exposed	Not exposed	Not exposed	Not exposed		Not exposed	Not exposed	Not exposed	Not exposed		Not exposed	Not exposed	Not exposed		Not exposed	Not exposed	Not exposed		Not exposed	Not exposed	Not exposed	Not exposed		Not exposed	Not exposed	Not exposed		Not exposed	Not exposed	Not exposed		Bagh	Gondwana	Not exposed		Lameta		Not exposed	Lameta Group	Lameta	Lameta	Lameta		Bagh		Lameta
	Precambrian Basement		Not exposed	Not exposed	Not exposed	Kaladgi / Dharwar Complex	Kaladgi / Dharwar Complex		Not exposed	Not exposed	Not exposed	Kaladgi / Dharwar Complex		Not exposed	Not exposed	Not exposed		Not exposed	Not exposed	Not exposed		Not exposed	Not exposed	Not exposed	Not exposed		Not exposed	Not exposed	Dharwar Complex		Not exposed	Not exposed	Not exposed		Not exposed	Not exposed	Not exposed	Pakhal Gr / Peninsular Gneisses	Not exposed		Not exposed	Not exposed	Not exposed	Not exposed	Not exposed		Not exposed	Vindhyan	Not exposed
	Comments / Notes				The Elephanta Formation is shown to be older than Diveghat and Purnadargad Formation.														Implied equivalences of Indrayani - Ajanta and Diveghat - Chikhli are not elaborated upon.									Implied equivalences of Indrayani - Ajanta, Diveghat - Chikhli etc are not elaborated upon.			Satpura Group has not been subdivided.	Satpura Group subdivided into 5 units (I - V) in the DRM.	Chahardih Formation only within the Tapi valley. Sequence in north unnamed.		Satpura Group subdivided into 5 units.									Upper Formations named, but lower basalt flows unnamed
			INDEX For shading used to denote dominant flow type
			Simple / āá
			Compound pahoehoe
			Unclassified
			Mixed (simple + compound)
			Differentiates
			General Comments / Observations
			Breaks between different sectors are shown to highlight the different geographic subprovinces of the DVP. Within each of these subprovinces, the districts are arranged North to South; and eastward in sequence.
			The northernmost exposures in parts of the Shivpuri, Shahdol, Sagar, Panna, Damoh districts of Madhya Pradesh have been named as Ranod and underlying Karwa Formations by GSI (2001).
			Only the numbers of the logs plotted in Fig. 9 (Main text) and Figs SD#2 1 - 4 are given here. Logs of other districts could not be plotted either due to inavailability of the DRM sheet or where data was insufficient to plot the logs.
			There are no clarifications available for some of the GSI (2001) nomenclatural ambiguities, and we have retained them ‘as published’. Examples: 1. Chahardih Formation is the name used for the Deccan basalts exposed as an inlier in the Tapi valley alluvial tract; while the sequence occurring on its north is not named in the Jalgaon district DRM. 2. In the Nagpur DRM, the Chikli and Karanja Formati…
			The mega-phenocryst basalt horizons (M1 to M4) have been depicted individually in the DRM sheets, and are clubbed with the underlying formation. Equivalence may be established between M3 = Bhimashankar GPB & M1 = Neral GPB for comparison with the chemostratigraphic classifications in Western DVP. No such marker horizons have been recorded in other parts of the DVP, although several horizons of me…
			Some authors (eg: Godbole, et al, 1986) have suggested equivalences between the chemostratigraphy and lithostratigraphy in the western region (along the west coast and the western parts of the Deccan Plateau). To that extent, we accept that (using the mega-phenocryst basalt horizons) and comparing published maps (Subbarao and Hooper ,1988; GSI, 2001)) a fair equivalence can be established between…
[truncated: 24 more columns]
